# Supplementary material for: Synthesis and characterization of imidazolium poly(azolyl)borate ionic liquids and their potential application in SO2 absorption
Source: Royal Society of Chemistry journal article supplement (doi:10.1039/c6ra10356a), 2016-01-01
Supplement: c6ra10356a1.pdf [file c6ra10356a1.pdf]

Supporting Information for:

**Synthesis and Characterization of Imidazolium Poly(azolyl)borate Ionic Liquids  
and Their Potential Application in SO<sub>2</sub> Absorption**

Yun Zhang<sup>a</sup>, Dongmei Lu<sup>\*b</sup>, Junjie Zhang<sup>b</sup> and Chao Wu<sup>\*a</sup>

<sup>a</sup> *Frontie Institute of Science and Technology, Xi'an Jiaotong University, Xi'an, Shaanxi 710049, China.*

<sup>b</sup> *Department of Applied Chemistry, School of Science, Xi'an Jiaotong University, Xi'an, Shaanxi, 710049 China.*

Submitted to *RSC Adv.* for consideration as a full paper

**Contents**

1. **SFigure 1.** Thermogravimetric curves for imidazolium dihydrobis(azolyl)borates.
2. **SFigure 2.** Thermogravimetric curves for imidazolium hydrotris(azolyl)borates.
3. **X-Ray diffraction data for compound 9.**
  - 1) **STable 1.** Crystal data and structure refinement for 1.
  - 2) **STable 2.** Fractional atomic coordinates and isotropic or equivalent isotropic displacement parameters (Å<sup>2</sup>).
  - 3) **STable 3.** Bond lengths [Å] and angles [deg] for 1.
  - 4) **STable 4.** Anisotropic displacement parameters (Å<sup>2</sup>) for 1.
  - 5) **STable 5.** Hydrogen coordinates and isotropic displacement parameters (Å<sup>2</sup>) for 1.

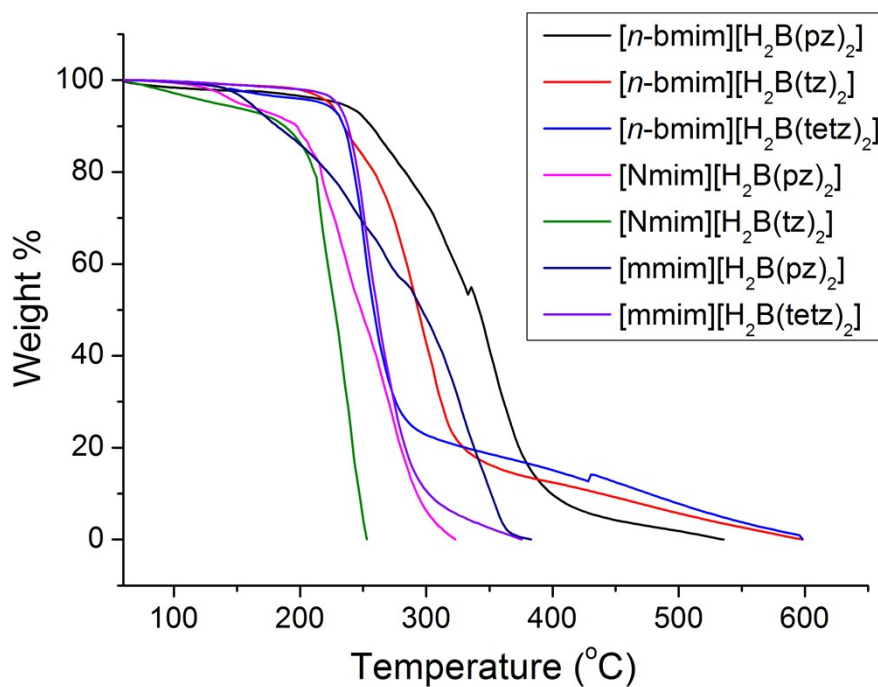

**SFig 1.** Thermogravimetric curves for imidazolium dihydrobis(azolyl)borates.

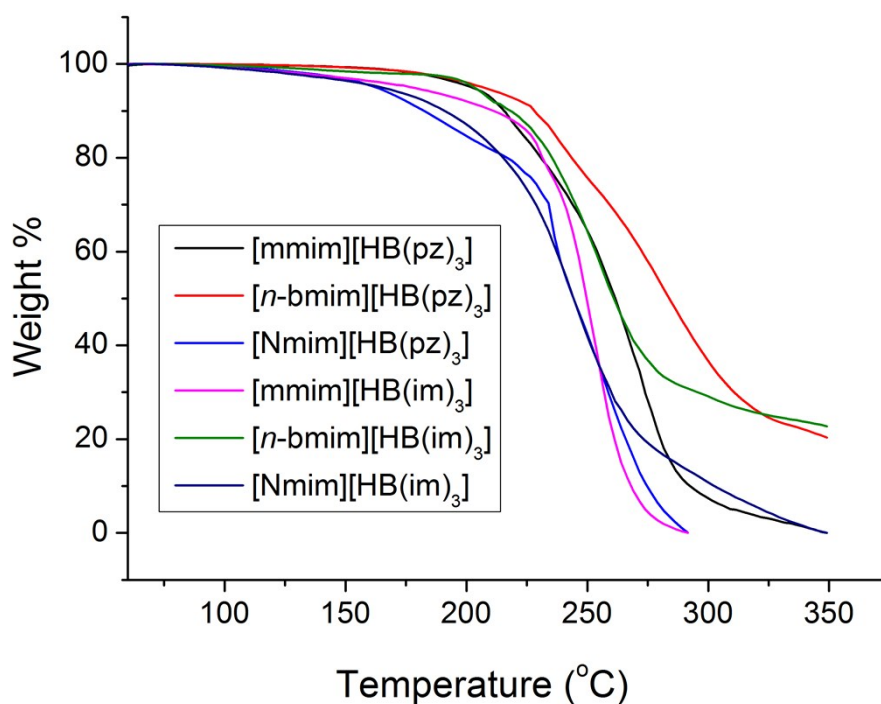

**SFig 2.** Thermogravimetric curves for imidazolium hydrotris(azolyl)borates.

### 3. X-Ray diffraction data for compound 9.

**STable 1.** Crystal data and structure refinement for 1.

|                                              |                                                                                                                                            |
|----------------------------------------------|--------------------------------------------------------------------------------------------------------------------------------------------|
| Identification code                          | 1                                                                                                                                          |
| Empirical formula                            | C <sub>14</sub> H <sub>19</sub> B N <sub>8</sub>                                                                                           |
| Formula weight                               | 310.18                                                                                                                                     |
| Temperature                                  | 296 K                                                                                                                                      |
| Wavelength                                   | 0.71073 Å                                                                                                                                  |
| Crystal system, space group                  | Triclinic, <i>p</i>                                                                                                                        |
| Unit cell dimensions                         | a = 8.7240 (14) Å    alpha = 78.447 (2) deg.<br>b = 8.8303 (15) Å    beta = 74.927 (2) deg.<br>c = 12.503 (2) Å    gamma = 60.694 (2) deg. |
| Volume                                       | 807.9 (2) Å <sup>3</sup>                                                                                                                   |
| Z, Calculated density                        | 2, 1.275 Mg/m <sup>3</sup>                                                                                                                 |
| Absorption coefficient                       | 0.08 mm <sup>-1</sup>                                                                                                                      |
| F(000)                                       | 328                                                                                                                                        |
| Crystal size                                 | 0.27 x 0.19 x 0.14 mm                                                                                                                      |
| Theta range for data collection              | 2.6 to 27.6 deg.                                                                                                                           |
| Limiting indices                             | -11 ≤ h ≤ 11, -11 ≤ k ≤ 11, -16 ≤ l ≤ 16                                                                                                   |
| Reflections collected / unique               | 3734 / 3309 [ <i>R</i> <sub>int</sub> = 0.012]                                                                                             |
| Completeness to theta = 27.6                 | 99.0 %                                                                                                                                     |
| Absorption correction                        | multi-scan                                                                                                                                 |
| Max. and min. transmission                   | 0.988 and 0.978                                                                                                                            |
| Refinement method                            | Full-matrix least-squares on F <sup>2</sup>                                                                                                |
| Data / restraints / parameters               | 3734 / 0 / 214                                                                                                                             |
| Goodness-of-fit on F <sup>2</sup>            | 1.06                                                                                                                                       |
| Final R indices [ <i>I</i> > 2σ( <i>I</i> )] | R <sub>1</sub> = 0.0621, wR <sub>2</sub> = 0.1977                                                                                          |
| R indices (all data)                         | R <sub>1</sub> = 0.0672, wR <sub>2</sub> = 0.2037                                                                                          |
| Largest diff. peak and hole                  | 0.65 and -0.66 e. Å <sup>-3</sup>                                                                                                          |

**STable 2.** Fractional atomic coordinates and isotropic or equivalent isotropic displacement parameters ( $\text{\AA}^2$ ).

|     | <i>x</i>    | <i>y</i>     | <i>z</i>     | $U_{\text{iso}}^*/U_{\text{eq}}$ |
|-----|-------------|--------------|--------------|----------------------------------|
| N3  | 0.39266(19) | 0.19510(18)  | 0.28130(12)  | 0.0329(3)                        |
| N5  | 0.71929(19) | 0.05440(19)  | 0.28742(13)  | 0.0340(3)                        |
| N7  | 0.5774(2)   | -0.13098(19) | 0.28216(13)  | 0.0342(3)                        |
| N4  | 0.3488(2)   | 0.3633(2)    | 0.23891(15)  | 0.0442(4)                        |
| N8  | 0.4764(3)   | -0.1794(2)   | 0.24305(16)  | 0.0491(5)                        |
| N6  | 0.6939(3)   | 0.1392(3)    | 0.37462(16)  | 0.0502(5)                        |
| C11 | 0.8976(2)   | -0.0388(2)   | 0.24655(17)  | 0.0369(4)                        |
| B1  | 0.5790(3)   | 0.0452(3)    | 0.23874(16)  | 0.0323(4)                        |
| C8  | 0.2598(2)   | 0.1883(3)    | 0.36277(16)  | 0.0405(4)                        |
| C14 | 0.6575(3)   | -0.2500(3)   | 0.36169(17)  | 0.0423(4)                        |
| C12 | 0.4970(3)   | -0.3299(3)   | 0.3012(2)    | 0.0508(5)                        |
| C6  | 0.1855(3)   | 0.4588(3)    | 0.2969(2)    | 0.0491(5)                        |
| C9  | 0.8602(3)   | 0.0993(3)    | 0.39166(18)  | 0.0473(5)                        |
| C10 | 0.9811(3)   | -0.0109(3)   | 0.3099(2)    | 0.0528(6)                        |
| C7  | 0.1236(3)   | 0.3557(3)    | 0.3751(2)    | 0.00489(5)                       |
| C13 | 0.6094      | -0.3810(3)   | 0.3763(2)    | 0.0516(5)                        |
| N1  | 0.8249(2)   | 0.2847(2)    | 0.00769(14)  | 0.0451(4)                        |
| N2  | 1.0619(3)   | 0.2628(2)    | 0.04766(15)  | 0.0466(4)                        |
| C5  | 0.9999(3)   | 0.2294(3)    | -0.02619(17) | 0.0441(5)                        |
| C4  | 0.7074(3)   | 0.2755(4)    | -0.0528(2)   | 0.0593(6)                        |
| C2  | 0.9200(4)   | 0.3426(3)    | 0.13206(19)  | 0.576(6)                         |
| C1  | 1.2495(4)   | 0.2131(4)    | 0.0441(2)    | 0.0650(7)                        |

**STable 3.** Bond lengths [ $\text{\AA}$ ] and angles [deg] for 1.

|        |           |         |           |
|--------|-----------|---------|-----------|
| N3—C8  | 1.347 (2) | C8—C7   | 1.378 (3) |
| N3—N4  | 1.367 (2) | C14—C13 | 1.377 (3) |
| N3—B1  | 1.550 (2) | C12—C13 | 1.387 (3) |
| N5—N6  | 1.356 (2) | C6—C7   | 1.388 (3) |
| N5—C11 | 1.364 (2) | C9—C10  | 1.392 (3) |
| N5—B1  | 1.543 (2) | N1—C5   | 1.329 (3) |
| N7—C14 | 1.344 (2) | N1—C3   | 1.376 (3) |
| N7—N8  | 1.369 (2) | N1—C4   | 1.462 (3) |
| N7—B1  | 1.548 (2) | N2—C5   | 1.325 (3) |

|            |             |             |             |
|------------|-------------|-------------|-------------|
| N4—C6      | 1.340 (3)   | N2—C2       | 1.381 (3)   |
| N8—C12     | 1.332 (3)   | N2—C1       | 1.463 (3)   |
| N6—C9      | 1.380 (3)   | C3—C2       | 1.346 (4)   |
| C11—C10    | 1.332 (3)   |             |             |
| C8—N3—N4   | 110.65 (15) | N7—C14—C13  | 108.24 (19) |
| C8—N3—B1   | 129.06 (15) | N8—C12—C13  | 112.07 (19) |
| N4—N3—B1   | 120.20 (14) | N4—C6—C7    | 111.85 (18) |
| N6—N5—C11  | 110.41 (15) | N6—C9—C10   | 104.63 (18) |
| N6—N5—B1   | 128.93 (15) | C11—C10—C9  | 111.60 (19) |
| C11—N5—B1  | 120.56 (15) | C8—C7—C6    | 104.43 (18) |
| C14—N7—N8  | 110.52 (16) | C14—C13—C12 | 104.28 (19) |
| C14—N7—B1  | 129.08 (15) | C5—N1—C3    | 108.67 (19) |
| N8—N7—B1   | 120.30 (15) | C5—N1—C4    | 125.47 (19) |
| C6—N4—N3   | 104.86 (16) | C3—N1—C4    | 125.8 (2)   |
| C12—N8—N7  | 104.89 (17) | C5—N2—C2    | 108.0 (2)   |
| N5—N6—C9   | 107.79 (18) | C5—N2—C1    | 125.9 (2)   |
| C10—C11—N5 | 105.57 (17) | C2—N2—C1    | 126.0 (2)   |
| N5—B1—N7   | 108.46 (14) | N2—C5—N1    | 108.98 (19) |
| N5—B1—N3   | 108.22 (14) | C2—C3—N1    | 106.7 (2)   |
| N7—B1—N3   | 108.78 (14) | C3—C2—N2    | 107.6 (2)   |
| N3—C8—C7   | 108.22 (18) |             |             |

Symmetry transformations used to generate equivalent atoms.

**STable 4.** Anisotropic displacement parameters ( $\text{\AA}^2$ ) for 1.

The anisotropic displacement factor exponent takes the form:

$$-2 \pi^2 [ h^2 a^{*2} U_{11} + \dots + 2 h k a^* b^* U_{12} ]$$

|     | $U^{11}$    | $U^{22}$    | $U^{33}$    | $U^{12}$    | $U^{13}$    | $U^{23}$    |
|-----|-------------|-------------|-------------|-------------|-------------|-------------|
| N3  | 0.0304 (7)  | 0.0299 (7)  | 0.0382 (8)  | -0.0136 (6) | -0.0085 (6) | -0.0008 (6) |
| N5  | 0.0290 (7)  | 0.0334 (7)  | 0.0401 (8)  | -0.0144 (6) | -0.0049 (6) | -0.0066 (6) |
| N7  | 0.0327 (7)  | 0.0318 (7)  | 0.0405 (8)  | -0.0141 (6) | -0.0099 (6) | -0.0063 (6) |
| N4  | 0.0405 (9)  | 0.0312 (8)  | 0.0566 (10) | -0.0156 (7) | -0.0082 (7) | 0.0011 (7)  |
| N8  | 0.0523 (10) | 0.0470 (10) | 0.0625 (11) | -0.0277 (8) | -0.0224 (9) | -0.0069 (8) |
| N6  | 0.0564 (11) | 0.0509 (10) | 0.0488 (10) | -0.0280 (9) | -0.0108 (8) | -0.0055 (8) |
| C11 | 0.0221 (7)  | 0.0362 (9)  | 0.0516 (10) | -0.0097 (7) | -0.0034 (7) | -0.0168 (8) |
| B1  | 0.0309 (9)  | 0.0329 (9)  | 0.0337 (9)  | -0.0147 (7) | -0.0063 (7) | -0.0041 (7) |
| C8  | 0.0356 (9)  | 0.0402 (10) | 0.0445 (10) | -0.0188 (8) | -0.0037 (7) | -0.0026 (8) |

|     |             |             |             |              |              |              |
|-----|-------------|-------------|-------------|--------------|--------------|--------------|
| C14 | 0.0424 (10) | 0.0362 (9)  | 0.0475 (10) | -0.0159 (8)  | -0.0145 (8)  | 0.0000 (8)   |
| C12 | 0.0490 (11) | 0.0420 (11) | 0.0694 (14) | -0.0266 (9)  | -0.0038 (10) | -0.0158 (10) |
| C6  | 0.0399 (10) | 0.0326 (9)  | 0.0692 (14) | -0.0101 (8)  | -0.0123 (9)  | -0.0085 (9)  |
| C9  | 0.0537 (12) | 0.0501 (11) | 0.0516 (11) | -0.0292 (10) | -0.0229 (9)  | -0.0008 (9)  |
| C10 | 0.0365 (10) | 0.0486 (12) | 0.0773 (15) | -0.0185 (9)  | -0.0200 (10) | -0.0049 (10) |
| C7  | 0.0330 (9)  | 0.0478 (11) | 0.0599 (13) | -0.0143 (9)  | -0.0004 (8)  | -0.0150 (10) |
| C13 | 0.0524 (12) | 0.0337 (10) | 0.0642 (14) | -0.0193 (9)  | -0.0085 (10) | 0.0003 (9)   |
| N1  | 0.0429 (9)  | 0.0420 (9)  | 0.0419 (9)  | -0.0155 (7)  | -0.0086 (7)  | 0.0033 (7)   |
| N2  | 0.0528 (10) | 0.0457 (9)  | 0.0413 (9)  | -0.0212 (8)  | -0.0126 (7)  | -0.0036 (7)  |
| C5  | 0.0430 (10) | 0.0440 (10) | 0.0406 (10) | -0.0157 (8)  | -0.0076 (8)  | -0.0065 (8)  |
| C3  | 0.0550 (13) | 0.0540 (13) | 0.0441 (11) | -0.0152 (11) | 0.0007 (10)  | -0.0050 (9)  |
| C4  | 0.0521 (13) | 0.0681 (15) | 0.0620 (14) | -0.0334 (12) | -0.0218 (11) | 0.0152 (12)  |
| C2  | 0.0748 (16) | 0.0530 (13) | 0.0393 (11) | -0.0251 (12) | -0.0073 (10) | -0.0091 (9)  |
| C1  | 0.0593 (14) | 0.0782 (18) | 0.0690 (16) | -0.0346 (13) | -0.0218 (12) | -0.0102 (13) |

**STable 5.** Hydrogen coordinates and isotropic displacement parameters ( $\text{\AA}^2$ ) for 1.

|     | <i>x</i> | <i>y</i> | <i>z</i>   | $U_{\text{iso}}^*/U_{\text{eq}}$ |
|-----|----------|----------|------------|----------------------------------|
| H11 | 0.9499   | -0.1075  | 0.1869     | 0.044*                           |
| H8  | 0.2600   | 0.0879   | 0.4036     | 0.049*                           |
| H14 | 0.7326   | -0.2449  | 0.4002     | 0.051*                           |
| H12 | 0.4425   | -0.3933  | 0.2924     | 0.061*                           |
| H6  | 0.1215   | 0.5795   | 0.2860     | 0.059*                           |
| H9  | 0.8858   | 0.1376   | 0.4457     | 0.057*                           |
| H10 | 1.1048   | -0.0592  | 0.3007     | 0.063*                           |
| H7  | 0.0147   | 0.3916   | 0.4247     | 0.059*                           |
| H13 | 0.6443   | -0.4809  | 0.4254     | 0.062*                           |
| H1  | 0.613(3) | 0.052(3) | 0.1475(17) | 0.033(5)                         |
| H5  | 1.0680   | 0.1759   | -0.0912    | 0.053*                           |
| H3  | 0.6570   | 0.4048   | 0.1493     | 0.069*                           |
| H4A | 0.6156   | 0.2549   | -0.0007    | 0.089*                           |
| H4B | 0.7761   | 0.1820   | -0.1003    | 0.089*                           |
| H4C | 0.6533   | 0.3835   | -0.0969    | 0.089*                           |
| H2  | 0.9255   | 0.3802   | 0.1947     | 0.069*                           |
| H1A | 1.3025   | 0.1035   | 0.0872     | 0.097*                           |
| H1B | 1.2563   | 0.3008   | 0.0744     | 0.097*                           |
| H1C | 1.3129   | 0.2022   | -0.0315    | 0.097*                           |
